# Supplementary material for: Comparative Incidence of Nephrotoxicity by Age Group among Adult Patients Receiving Vancomycin
Source: PubMed Central journal article supplement — Infect Dis Ther. 2013 Dec 11;2(2):201–8. doi: 10.1007/s40121-013-0022-6 (PMC4108114; doi:10.1007/s40121-013-0022-6), 2013-12-11
Supplement: 40121_2013_22_MOESM1_ESM.pdf [file 40121_2013_22_MOESM1_ESM.pdf]

- Little is known regarding age-related risk of nephrotoxicity during vancomycin therapy since the publication of the 2009 vancomycin consensus guidelines for therapeutic drug monitoring.
- This matched cohort study evaluated 132 patients receiving vancomycin, grouped by age: young (18-64 years), older adults (65-79 years) and very elderly ( $\geq 80$  years), matched on previously published risk factors for nephrotoxicity.
- Outcomes included traditional vancomycin nephrotoxicity and acute kidney injury network modified definition of nephrotoxicity.
- The incidence of acute kidney injury was 34.1% vs. 34.1% vs. 31.8% in the young, older adults and very elderly groups, respectively ( $p = 0.97$ ).
- No differences in risk of acute kidney injury were identified between young, older, and very elderly adults when adjusting for other risk factors.

This summary slide represents the opinions of the authors, and not necessarily the opinions of the publisher or editorial board. This material has been peer reviewed. For a full list of acknowledgments and conflicts of interest for all authors of this article, please see the full text online.
